# Supplementary material
Source: PubMed Central journal article supplement (PMC3207160)
Supplement: mmc1.pdf [file mmc1.pdf]

## Supplementary Material

### Focal adhesion kinase stabilizes the cytoskeleton

Ben Fabry, Anna H. Klemm, Sandra Kienle, Tilman E. Schäffer, and Wolfgang H. Goldmann

Department of Physics, University of Erlangen-Nuremberg, Erlangen, Germany

#### Statistical evaluation of diverging effects of the ROCK inhibitor Y27632 on FAKwt vs. FAK<sup>-/-</sup> cells

We confirmed that the stiffness change in FAK<sup>-/-</sup> cells after Y27632-treatment was highly correlated ( $r^2=0.51$ ) with the stiffness before Y27632-treatment (Fig. S1 right). With  $n=16$  independent measurements, this correlation was statistically significant (t-statistics,  $p<0.01$ ). We also confirmed that FAKwt cells tended to soften after ROCK inhibition regardless of baseline stiffness (Fig. S1 left). The correlation between FAKwt cell stiffness before vs. fold-change after ROCK inhibition was not significant ( $r^2=0.02$ ,  $p>0.05$ ). Note that because of the log-normal distribution of cell stiffness, the data were transformed to logarithmic space prior to performing a correlation analysis.

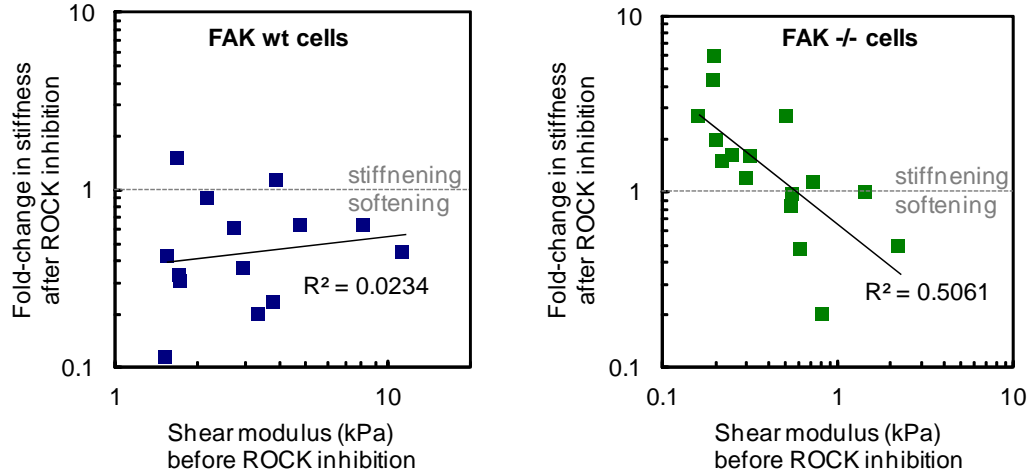

Fig. S1: Fold-change in stiffness following ROCK inhibition with Y27632 (10  $\mu$ M) vs. cell stiffness before treatment measured with AFM in FAKwt cells (left) and FAK<sup>-/-</sup> cells (right). A linear correlation analysis after logarithmically transforming the data reveals only in FAK<sup>-/-</sup> cells a statistically significant ( $p<0.01$ ) relationship between initial cell stiffness and fold-change in stiffness after ROCK inhibition: Soft FAK<sup>-/-</sup> cells stiffened after treatment with the ROCK-inhibitor Y27632, whereas stiff cells softened. In contrast, FAKwt cells softened after ROCK inhibition regardless of initial stiffness.
